# Supplementary material for: Instability-Induced Crystal Self-Assembly in Film-Substrate System for the Construction of Large-Area Micro- and Nano-Chiral Structures
Source: Research Square preprint supplement (doi:10.21203/rs.3.rs-5668074/v1), 2025-01-09
Supplement: Supplementary file 1 [file 7b6ca96c9e7c20d2a645409c.docx]

Supplementary material for

Instability-Induced Crystal Self-Assembly in Film-Substrate System for the Construction of Large-Area Micro- and Nano-Chiral Structures

Fushuai Wanga, Quanzi Yuanb,c*, Xinghua Shia,c*

a *Laboratory of Theoretical and Computational Nanoscience, National Center for Nanoscience and Technology, Chinese Academy of Sciences, Beijing 100190, People’s Republic of China*

b *State Key Laboratory of Nonlinear Mechanics, Institute of Mechanics, Chinese Academy of Sciences, Beijing 100190, People’s Republic of China*

c *University of Chinese Academy of Sciences, Beijing 100049, People’s Republic of China*

AUTHOR INFORMATION

Corresponding Authors

Prof. Dr. Quanzi Yuan

Tel: 86-10-8254 3979

State Key Laboratory of Nonlinear Mechanics (LNM)

Institute of Mechanics, Chinese Academy of Sciences

No. 15, Beisihuanxi Road, Beijing, China, 100190

E-mail: yuanquanzi@lnm.imech.ac.cn

Prof. Dr. Xinghua Shi

Tel: 86-10-8254 4313

Laboratory of Theoretical and Computational Nanoscience

National Center for Nanoscience and Technology, Chinese Academy of Sciences

No. 11, Beiyitiao Alley, Beijing, China, 100190

E-mail: shixh@nanoctr.cn

In the Supplementary material, we give the details of the additional experiments. The contents are arranged as follows:

1. Experimental process of IICSA (Movie S1).
2. Transition process from lamella to fiber (Movie S2).
3. PIV results within the ibu-film (Movie S3).
4. The molecular structure of ibuprofen (Figure S1).
5. Variation of the average relative gray value of the interference colors on the ibu-film surface with time (Figure S2).
6. Experimental model for measuring ibu-film thickness (Figure S3).
7. Fractal dimension of the self-assembly structure. (Figure S4).
8. Scaling relationship between surface tension and concentration (Figure S5).
9. Self-assembly structure before and after contact angle testing (Figure S6).
10. Surface roughness measurement of the PS substrate (Figure S7).


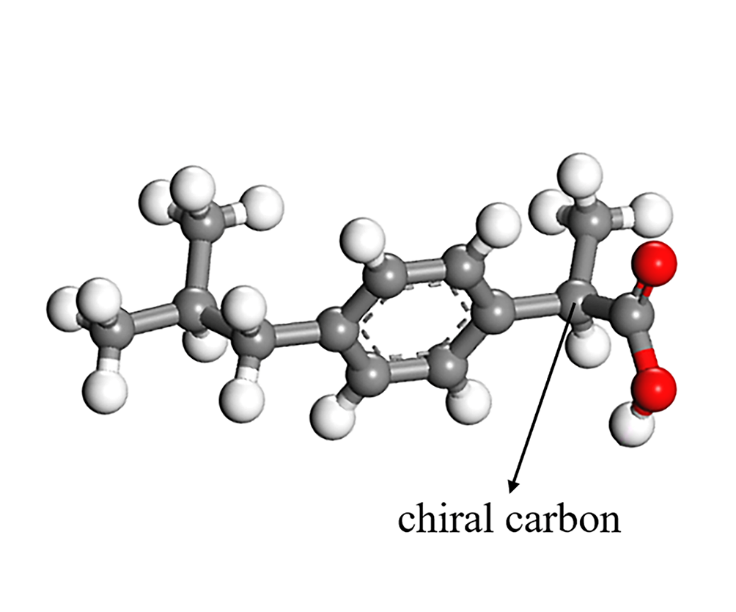


**Fig. S1.** The molecular structure of ibuprofen, where gray, white, and red spheres represent carbon, hydrogen, and oxygen atoms, respectively.


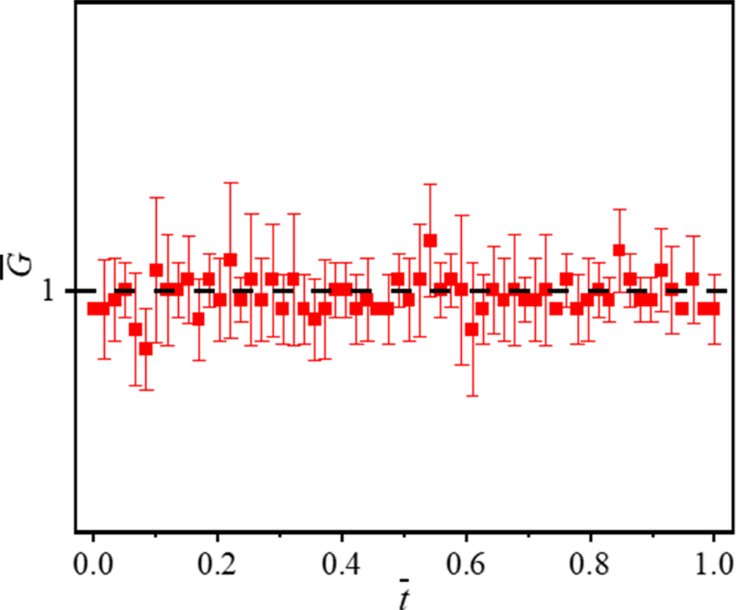


**Fig. S2.** The variation of the average relative gray value of the interference colors on the ibu-film surface with time, with both of them being dimensionless.


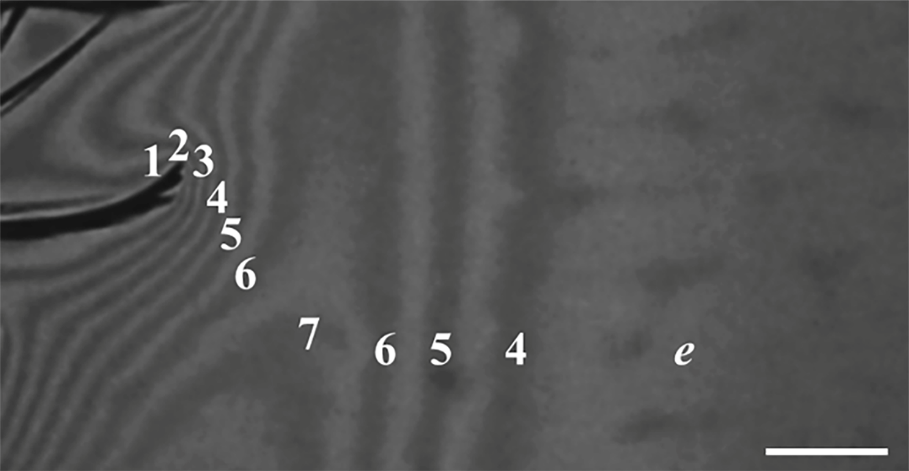


**Fig. S3.** Experimental model for measuring ibu-film thickness using optical interference fringe method. Scale bar:


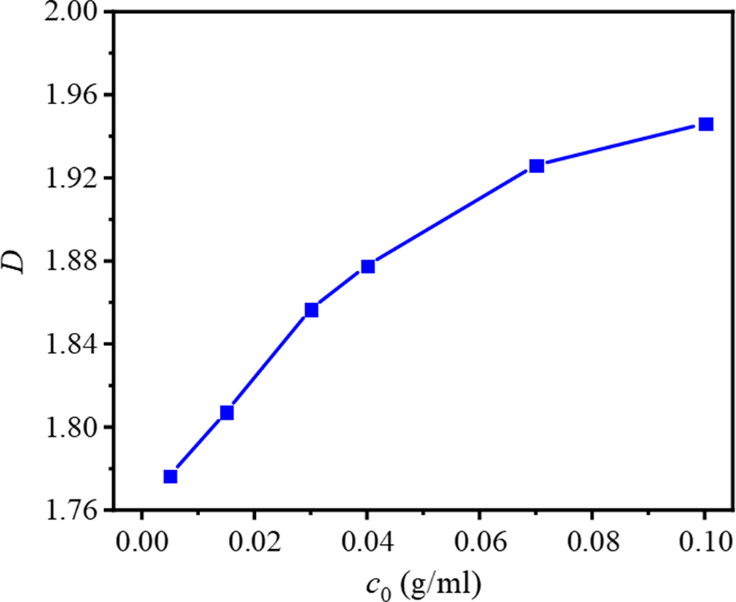


**Fig. S4.** The fractal dimension of the self-assembly structure corresponding to different initial ibuprofen concentrations.


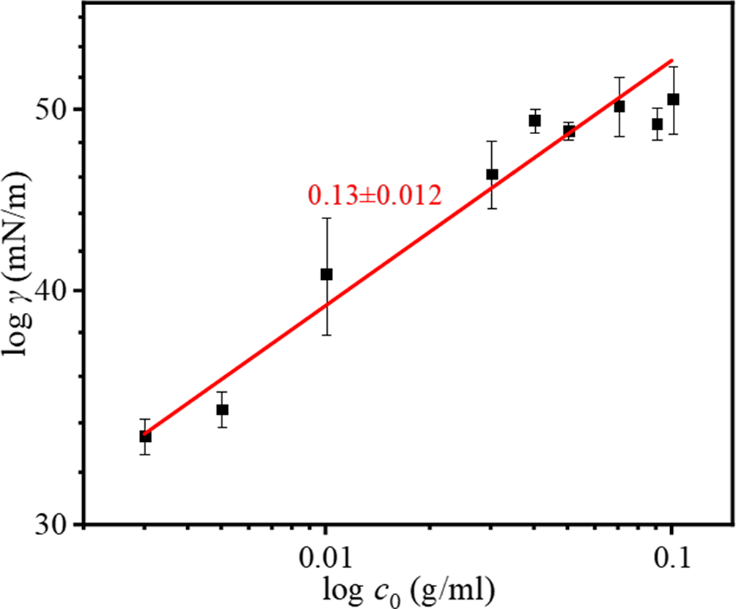


**Fig. S5.** The relationship between the surface tension of the ibu-film and the initial ibuprofen concentration in a log-log plot, where the red line represents a scale of 0.13.


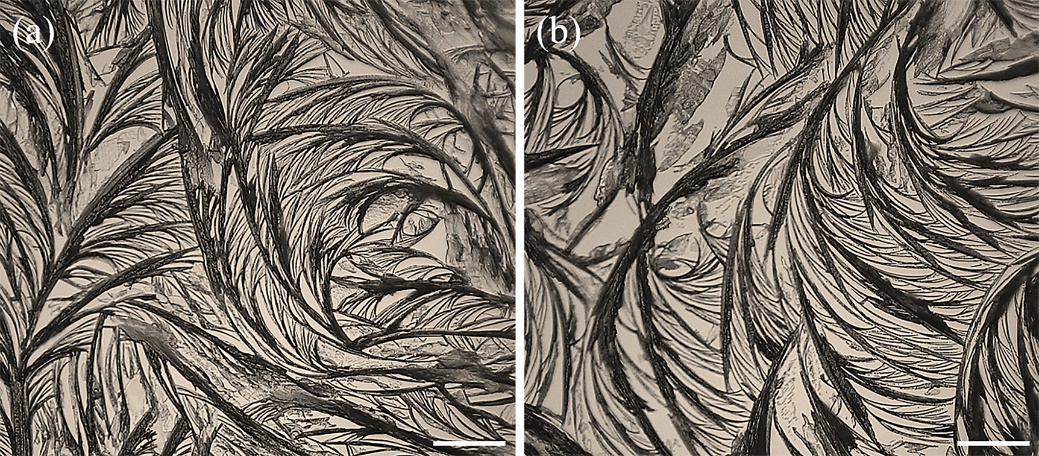


**Fig. S6.** Characterization of the self-assembly structure before (a) and after (b) contact angle testing. Scale bar:


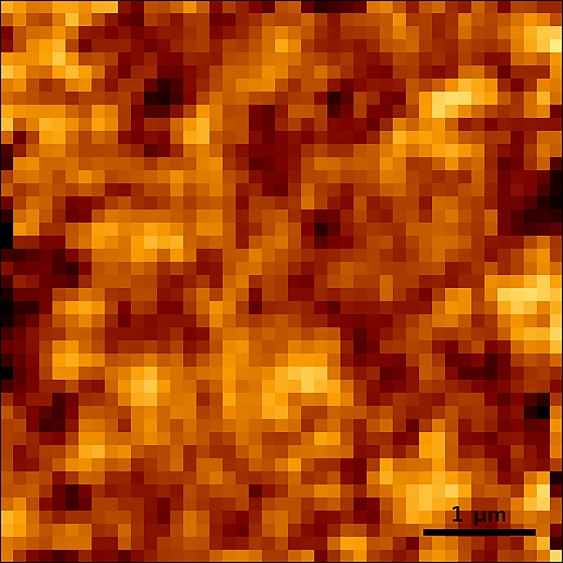


**Fig. S7.** Surface roughness measurement of the PS substrate, with a root-mean-square roughness of approximately 1.6 nm.
